# Supplementary material
Source: Springer Nature journal article supplement (https://www.springermedizin.de/resource/supplementary/12885_2014_4841_MOESM1_ESM.pdf/9467488)

**LKB1**

**PTEN**

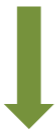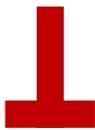

**AMPK**

**Akt1/2**

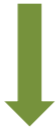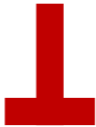

**FoxO3A**

Supplement: MOESM1 [file 9467488]
